# Supplementary material
Source: publisher site journal article supplement (https://www.dovepress.com/get_supplementary_file.php?f=398850.docx)

Supplementary **Table 1**. The positive pathogen results of Patients in the Development Dataset

| Pathogen [No. (%)] | Without PJP | With PJP |
| --- | --- | --- |
| (n=343) | (n=110) |
| *Burkholderia* | 13 (4.01) | 5 (4.55) |
| *Legionella* | 6 (1.85) | 1 (0.91) |
| *Escherichia coli* | 12 (3.70) | 1 (0.91) |
| *Haemophilus influenzae* | 1 (0.31) | 1 (0.91) |
| *Streptococcus pneumoniae* | 3 (0.93) | 0 (0.00) |
| *Staphylococcus aureus* | 7 (2.16) | 2 (1.82) |
| *Stenotrophomonas maltophilia* | 7 (2.16) | 1 (0.91) |
| *Enterobacter cloacae* | 4 (1.23) | 1 (0.91) |
| *Nocardia* | 6 (1.85) | 2 (1.82) |
| *Pseudomonas* | 32 (9.88) | 8 (7.27) |
| *Klebsiella pneumoniae* | 30 (9.26) | 7 (6.36) |
| *Acinetobacter* | 29 (8.95) | 10 (9.09) |
| *Enterococcus* | 3 (0.93) | 1 (0.91) |
| *Cytomegalovirus* | 89(27.47) | 59 (53.64) |
| *Influenza A virus* | 33(10.19) | 3 (2.73) |
| *Influenza B virus* | 8 (2.47) | 3 (2.73) |
| *Respiratory syncytial virus* | 36(11.11) | 1 (0.91) |
| *Adenovirus* | 2 (0.62) | 0 (0.00) |
| *Parainfluenza virus* | 17 (5.25) | 1 (0.91) |
| *Herpes simplex virus type 1* | 1 (0.31) | 2 (1.82) |
| *Epstein-Barr virus* | 21 (6.48) | 16 (14.55) |
| *Rhinovirus* | 3 (0.93) | 2 (1.82) |
| *Mycoplasma pneumoniae* | 1 (0.31) | 2 (1.82) |
| *Aspergillus* | 44(13.58) | 12 (10.91) |
| *Cryptococcus* | 2 (0.62) | 0 (0.00) |
| *Mycobacterium tuberculosis* | 7 (2.16) | 0 (0.00) |

Supplementary **Table 2**. Clinical Variables among Patients in the Validation Group

| Variables [mean ± SD or No. (%)] | Without PJP | With PJP |
| --- | --- | --- |
| (n=79) | (n=40) |
| Age, years | 49.86 ± 18.49 | 49.45 ± 13.69 |
| Lymphocytes count, ×109/L | 2.10 ± 4.07 | 0.81 ± 1.11 |
| Fever | 22 (27.85) | 20 (50.00) |
| Dry cough | 15 (18.99) | 11 (27.50) |
| Respiratory failure | 1 (1.27) | 18 (45.00) |
| GGO | 15 (18.99) | 27 (67.50) |
| Steroid therapy (≥1 year) | 40 (50.63) | 8 (20.00) |
| Immunosuppressive agents therapy | 28 (35.44) | 26 (65.00) |

GGO, Ground-glass opacity.

Supplementary **Table 3**. Clinical Characteristics in the Development and Validation Group

| Variables [mean ± SD or No. (%)] | Development  Group (n=434) | Validation Group (n=119) | *P*-value |
| --- | --- | --- | --- |
|
| Age, years | 57.28 ± 14.78 | 49.72 ± 16.97 | <0.001 |
| Lymphocytes count, ×109/L | 1.05 ± 0.86 | 1.67 ± 3.43 | 0.614 |
| Fever | 344 (79.26) | 42 (35.29) | <0.001 |
| Dry cough | 84 (19.35) | 26 (21.85) | 0.546 |
| Respiratory failure | 224 (51.61) | 19 (15.97) | <0.001 |
| GGO | 275 (63.36) | 42 (35.29) | <0.001 |
| Steroid therapy (≥1 year) | 143 (32.95) | 48 (40.34) | 0.133 |
| Immunosuppressive agents therapy | 202 (46.54) | 54 (45.38) | 0.821 |
| COPD | 37 (8.53) | 3 (2.52) | 0.025 |
| NS | 61 (14.06) | 47 (39.50) | <0.001 |
| PJP | 110 (25.35) | 40 (33.61) | 0.072 |

GGO, Ground-glass opacity; COPD, chronic obstructive pulmonary disease; NS, nephrotic syndrome; PJP, *Pneumocystis jirovecii* pneumonia.

Supplementary **Table 4.** Classification Accuracy at Different Probability Cut-off Points for the PJP Diagnostic Model

| Probability Threshold | Sensitivity (%) | Specificity (%) | PPV  (%) | NPV  (%) | Likelihood Ratio + | Likelihood Ratio - |
| --- | --- | --- | --- | --- | --- | --- |
| ≥10% | 93.64 | 43.21 | 35.89 | 95.24 | 1.65 | 0.15 |
| ≥30% | 73.63 | 77.47 | 52.6 | 89.64 | 3.27 | 0.34 |
| ≥50% | 40.91 | 92.56 | 65.22 | 82.19 | 5.52 | 0.64 |
| ≥70% | 12.73 | 99.07 | 82.35 | 76.98 | 13.75 | 0.88 |
| ≥90% | 1.82 | 100 | 100 | 75 | Inf | 0.98 |

PPV, Positive predictive value; NPV, Negative predictive value.

Supplementary **Figure 1. Profile plots from the LASSO model.** (A) LASSO coefficient profiles of the 82 baseline features. (B) Tuning of parameter (λ) selection in the LASSO model using 10-fold cross-validation. Lambda.1se (log) [largest value of lambda such that error is within 1 standard error of the minimum]: 0.0484 (-3.0293).


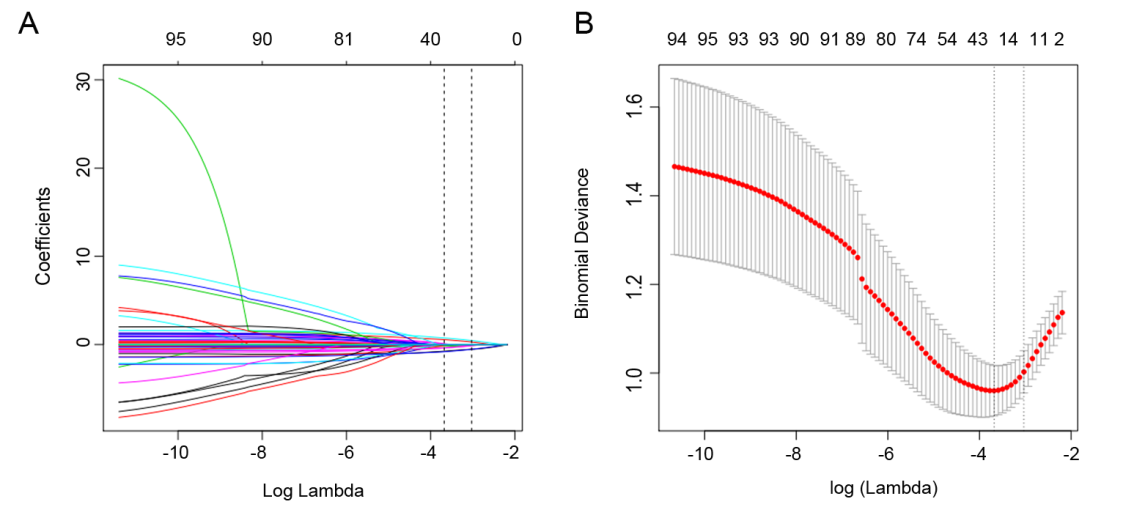

Supplement: Supplementary file 1 [file get_supplementary_file.php]
